# Supplementary material for: [Retracted] Lagerstroemia speciosa Ameliorated Blood Pressure in LNAME Induced Hypertension in Experimental Rats through NO/cGMP and Oxidative Stress Modulation
Source: Hindawi journal article supplement (doi:10.1155/2022/5894416), 2022-01-01
Supplement: f1 [file 5894416.f1.doc]

***Lagerstroemia speciosa* ameliorated blood pressure in L-NAME induced hypertension in experimental rats through NO/cGMP and oxidative stress modulation**

Mohammed S. Aleissa1*, Mohammed Al-Zharani1, Lina M Alneghery1, Md Saquib Hasnain2, Bader Almutairi3, Daoud Ali3, Saud Alarifi3, Saad Alkahtani3

*1Department of Biology, College of Science, Imam Mohammad Ibn Saud Islamic University, Riyadh, Saudi Arabia.*

*2Department of Pharmacy, Palamau Institute of Pharmacy, Chianki, Daltonganj 822102, Jharkhand, India.*

*3Department of Zoology, College of Science, King Saud University, Riyadh, Saudi Arabia.*

***Corresponding author:**

Prof. Mohammed S. Aleissa. Department of Biology, College of Science, Imam Mohammad Ibn Saud Islamic University, Riyadh, Saudi Arabia. Email: [msaleissa@imamu.edu.sa](mailto:msaleissa@imamu.edu.sa)

**Preparation of extract:**

The ethanolic extract of *Lagerstroemia speciosa* was used in the present study. The leaves were shadow dried. Then it was crushed into small particles finely, followed by extraction using ethanol (70% v/v) and left for about 24 hours. This process was repeated three times. Further, the obtained extract was filtered and then concentrated at 40 ◦C using rotavapor.


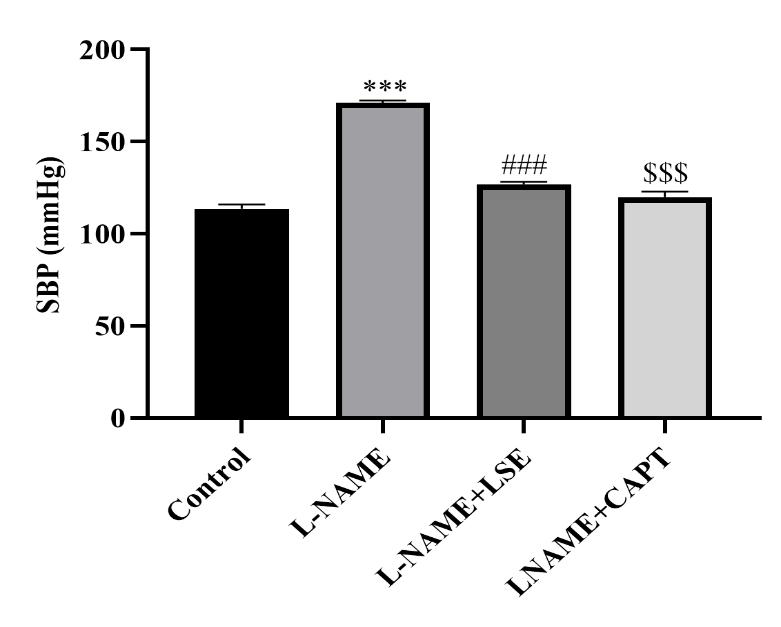


**Figure S1:** Effect of LSE and CAPT on systolic blood pressure. Data are shown as Mean ± S.E.M, *Control vs LNAME; #LNAME vs LNAME+LSE. **P < 0.01, ***P < 0.001; #P < 0.05, ##P < 0.01, ###P < 0.001; δP < 0.05, δδP < 0.01, δδδP < 0.001.


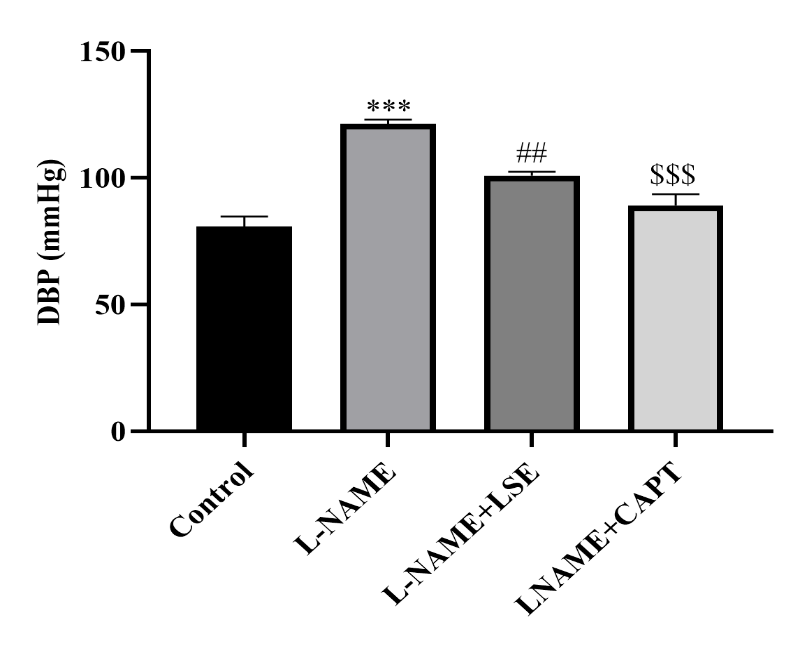


**Figure S2:** Effect of LSE and CAPT on diastolic blood pressure. Data are shown as Mean ± S.E.M, *Control vs LNAME; #LNAME vs LNAME+LSE. **P < 0.01, ***P < 0.001; #P < 0.05, ##P < 0.01, ###P < 0.001; δP < 0.05, δδP < 0.01, δδδP < 0.001.


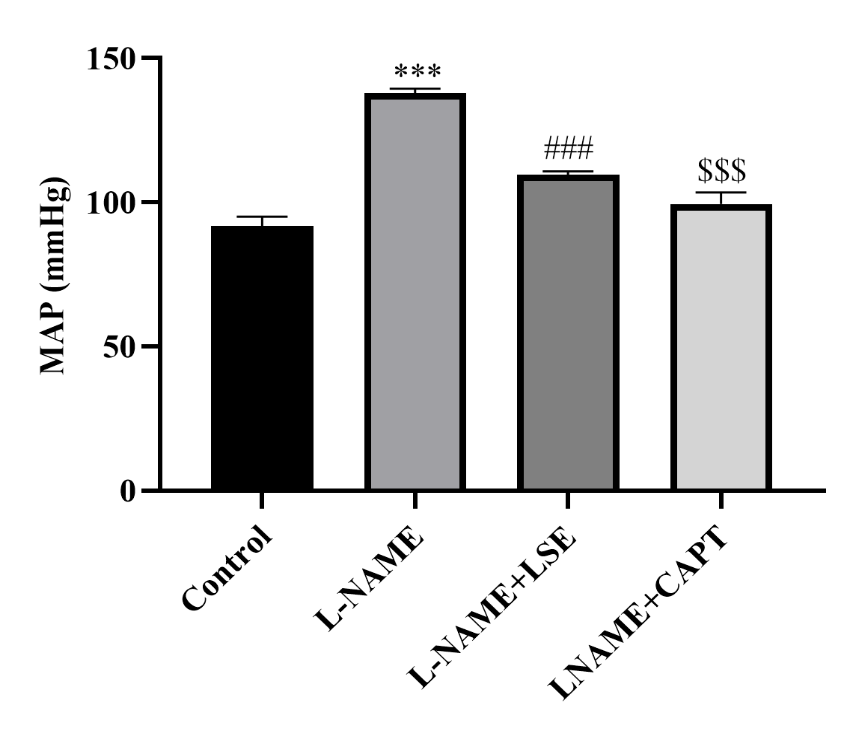


**Figure S3:** Effect of LSE and CAPT on mean arterial blood pressure. Data are shown as Mean ± S.E.M, *Control vs LNAME; #LNAME vs LNAME+LSE. **P < 0.01, ***P < 0.001; #P < 0.05, ##P < 0.01, ###P < 0.001; δP < 0.05, δδP < 0.01, δδδP < 0.001.


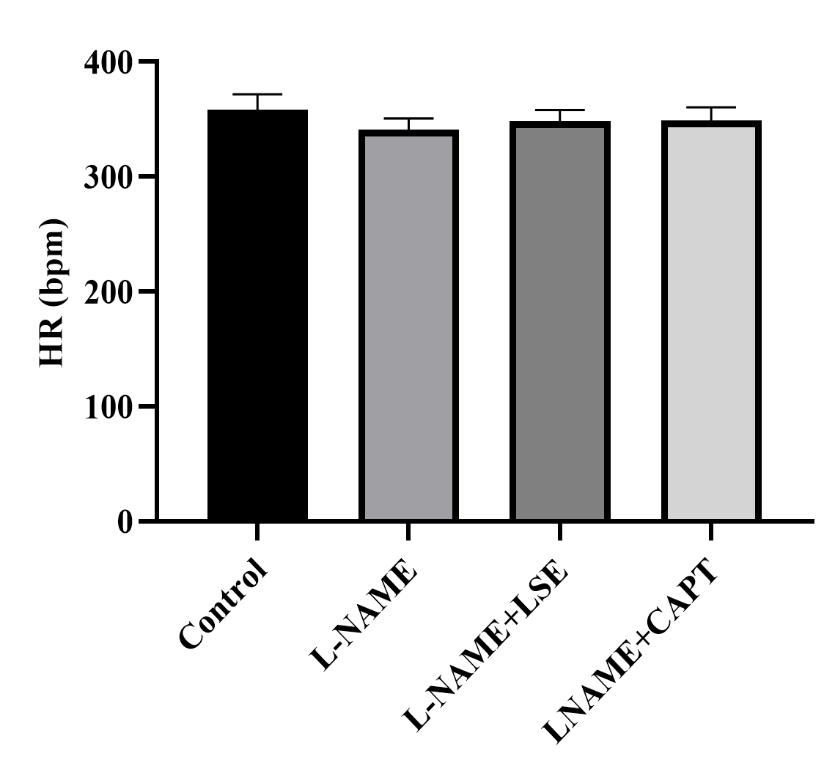


**Figure S4:** Effect of LSE and CAPT on systolic blood pressure. Data are shown as Mean ± S.E.M, *Control vs LNAME; #LNAME vs LNAME+LSE. **P < 0.01, ***P < 0.001; #P < 0.05, ##P < 0.01, ###P < 0.001; δP < 0.05, δδP < 0.01, δδδP < 0.001.

**Table 1:** List of primers

| rIL6 | F  R | 5’TCCGGAGAGGAGACTTCACA3’  5’TCTGACAGTGCATCATCGCT3’ |
| --- | --- | --- |
| rIL1 | F  R | 5’ATGAAAGACGGCACACCCAC3’  5’TGTCCCGACCATTGCTGTTT3’ |
| rTNF- | F  R | 5’ATCCGAGATGTGGAACTGGC3’  5’ACTGATGAGAGGGAGCCCAT3’ |
| rGAPDH | F  R | 5’GCGAGATCCCGCTAACATCA3’  5’CTCGTGGTTCACACCCATCA3’ |
